# Supplementary material for: LW1497, an Inhibitor of Malate Dehydrogenase, Suppresses TGF-β1-Induced Epithelial-Mesenchymal Transition in Lung Cancer Cells by Downregulating Slug
Source: MDPI journal article supplement (doi:10.3390/antiox10111674), 2021-10-24
Supplement: s1 [file s1]

| Gene    | Category                                                 | Fold change        |             |                           |
|---------|----------------------------------------------------------|--------------------|-------------|---------------------------|
|         |                                                          | TGF- $\beta$ 1/CTR | AC1497 /CTR | AC1497+TGF- $\beta$ 1/CTR |
| CDKN1C  | Aging, Cell cycle, EMT, Hypoxia, Metastasis              | 0.469              | 1.207       | 1.195                     |
| GRB7    | Cell migration, Metastasis                               | 0.504              | 0.941       | 1.037                     |
| MYEF2   | RNA processing                                           | 0.520              | 1.085       | 1.034                     |
| SAT1    | Angiogenesis, EMT, Hypoxia, Metastasis                   | 0.423              | 0.919       | 0.819                     |
| SGSM3   | Cell cycle                                               | 0.609              | 1.158       | 1.162                     |
| TPPP    | Cell cycle                                               | 0.478              | 1.042       | 0.895                     |
| CTSS    | Metastasis                                               | 0.505              | 1.036       | 0.905                     |
| EZR     | Cell cycle, Hypoxia, Metastasis                          | 0.506              | 1.011       | 0.895                     |
| FGFR3   | Metastasis                                               | 0.478              | 0.802       | 0.831                     |
| CTSC    | Aging, Metastasis                                        | 0.516              | 0.977       | 0.893                     |
| SLC16A1 | Cell migration, Hypoxia, Metastasis                      | 1.627              | 1.018       | 1.112                     |
| TENM3   | Metastasis                                               | 1.508              | 0.880       | 1.027                     |
| SLC7A6  | Cell cycle, Cell migration, Hypoxia                      | 1.554              | 0.921       | 1.055                     |
| CXCR5   | Cell migration, Metastasis                               | 1.662              | 0.961       | 1.126                     |
| DDX6    | RNA processing                                           | 1.551              | 0.895       | 1.027                     |
| SRF     | Aging, Angiogenesis, Cell migration, Hypoxia, Metastasis | 1.821              | 1.024       | 1.175                     |
| SLUG    | Cell migration, EMT, Hypoxia, Metastasis                 | 2.045              | 1.242       | 1.245                     |
| SMARCC1 | Hypoxia, Metastasis, RNA processing                      | 1.643              | 0.863       | 0.987                     |
| RASSF10 | Metastasis                                               | 1.857              | 1.067       | 1.094                     |
| RRP12   | RNA processing                                           | 1.559              | 0.826       | 0.907                     |

| AC1497+TGF- $\beta$ 1/TGF $\beta$ 1 |
|-------------------------------------|
| 2.548                               |
| 2.059                               |
| 1.986                               |
| 1.938                               |
| 1.907                               |
| 1.873                               |
| 1.792                               |
| 1.768                               |
| 1.739                               |
| 1.730                               |
| 0.684                               |
| 0.681                               |
| 0.679                               |
| 0.678                               |
| 0.662                               |
| 0.645                               |
| 0.609                               |
| 0.601                               |
| 0.589                               |
| 0.582                               |
