# Supplementary figures and images for: LW1497, an Inhibitor of Malate Dehydrogenase, Suppresses TGF-β1-Induced Epithelial-Mesenchymal Transition in Lung Cancer Cells by Downregulating Slug
Source: MDPI journal article supplement (doi:10.3390/antiox10111674), 2021-10-24

Supplement Figure S1

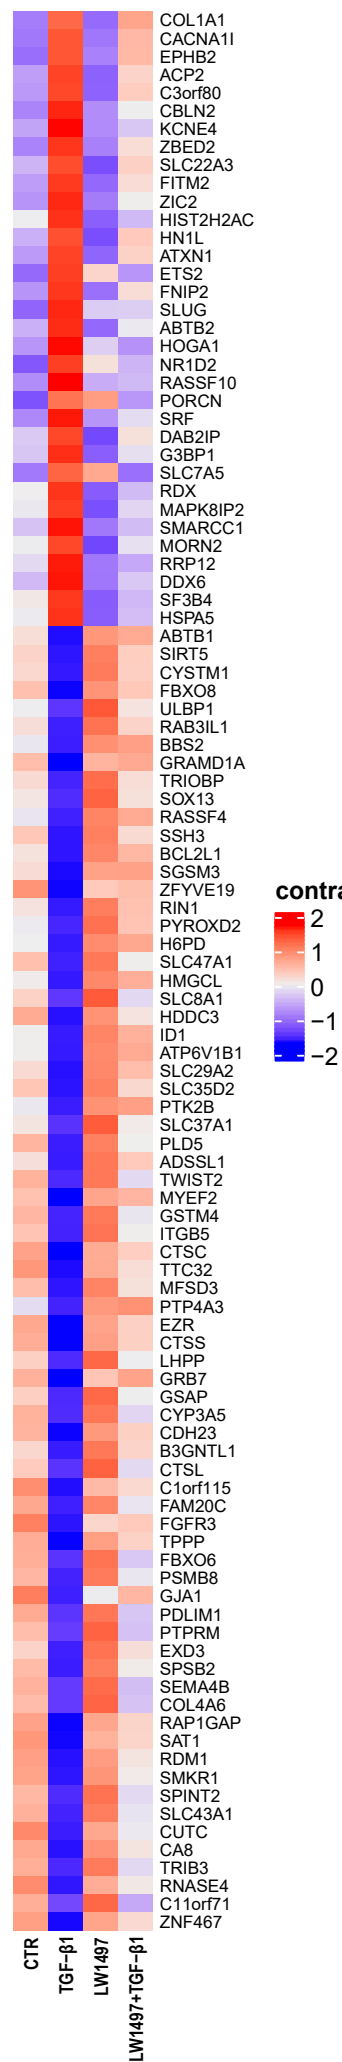

Supplement: s1 [file s1]
